## CORRECTION

# The advancement of human pluripotent stem cell-derived therapies into the clinic

**R. Scott Thies and Charles E. Murry**

There was an error published in *Development* **142**, 3077-3084.

On p. 3081, it was incorrectly stated that Dr Lorenz Studer's group is supported by the New York Stem Cell Foundation. The correct funding credit is the New York State Stem Cell Science program.

The authors apologise to readers for this mistake.
